# Supplementary material for: Metallocenoids of platinum: Syntheses and structures of triangular triplatinum sandwich complexes of cycloheptatrienyl
Source: Royal Society of Chemistry journal article supplement (doi:10.1039/c0sc00269k), 2010-09-07
Supplement: c0sc00269k.pdf [file c0sc00269k.pdf]

## Supplementary Materials

### **Metallocenoids of Platinum: Syntheses and Structures of Triangular Triplatinum Sandwich Complexes of Cycloheptatrienyl**

Tetsuro Murahashi,\* Kentaro Usui, Ryou Inoue, Sensuke Ogoshi, and Hideo Kurosawa

*Department of Applied Chemistry  
Graduate School of Engineering, Osaka University  
Suita, Osaka, 565-0871, Japan*

## Experimental Section

**General Consideration.** All manipulations were conducted under a nitrogen atmosphere using standard Schlenk or drybox techniques.  $^1\text{H}$ ,  $^{13}\text{C}\{^1\text{H}\}$ ,  $^{31}\text{P}\{^1\text{H}\}$  NMR spectra were recorded on 270 MHz (JEOL GSX-270) and 400 MHz (JEOL GSX-400, Bruker DPX-400) instruments. The chemical shifts were referenced to the residual resonances of deuterated solvents. Elemental analyses were performed at the Analytical Center, Faculty of Engineering, Osaka University. X-ray crystal data were collected by Rigaku RAXIS-RAPID Imaging Plate diffractometer. Unless specified, all reagents were purchased from commercial suppliers and used without purification. Dichloromethane, acetonitrile,  $\text{Et}_2\text{O}$ , *n*-hexane,  $\text{CD}_2\text{Cl}_2$ , and  $\text{CD}_3\text{CN}$  were purified according to the standard procedures.  $\text{Pt}_2(\text{dba})_3$ <sup>1,2</sup> and  $\text{NaB}(\text{Ar}^{\text{F}})_4$ <sup>3</sup> were prepared according to the literature.

**Synthesis of  $[\text{Pt}_3(\mu_3\text{-C}_7\text{H}_7)_2(\text{CH}_3\text{CN})_3][\text{BF}_4]_2$  (**1-CH<sub>3</sub>CN**):** To a  $\text{CH}_2\text{Cl}_2$  solution (250 mL) of  $\text{Pt}_2(\text{dba})_3$  (300 mg, 0.25 mmol) was added  $[\text{C}_7\text{H}_7][\text{BF}_4]$  (58 mg, 0.33 mmol) and  $\text{CH}_3\text{CN}$  (131  $\mu\text{L}$ ). The reaction mixture was stirred for 11 h at room temperature. The precipitate was collected through filtration, and washed with  $\text{CH}_2\text{Cl}_2$ . Then extraction with  $\text{CH}_3\text{CN}$  followed by filtration, concentration, and precipitation by adding  $\text{Et}_2\text{O}$  gave a brown powder of **1-CH<sub>3</sub>CN** (122 mg, 69% yield).  $^1\text{H}$  NMR (400 MHz,  $\text{CD}_3\text{CN}$ , 25 °C):  $\delta$  4.20 (s,  $\text{C}_7\text{H}_7$ ).  $^{13}\text{C}\{^1\text{H}\}$  NMR (100.5 MHz,  $\text{CD}_3\text{NO}_2$ , 25 °C):  $\delta$  122.6 (s,  $\text{CH}_3\text{CN}$ ), 59.7 (s,  $\text{C}_7\text{H}_7$ ), 2.9 (s,  $\text{CH}_3\text{CN}$ ). Anal. Calcd. for  $\text{C}_{20}\text{H}_{23}\text{B}_2\text{F}_8\text{N}_3\text{Pt}_3$ : C, 22.57; H, 2.18; N, 3.95. Found: C, 22.59; H, 2.22; N, 3.88. Crystalline samples of **1-CH<sub>3</sub>CN** were obtained by recrystallization from  $\text{CH}_3\text{CN}/\text{Et}_2\text{O}$ .

**Synthesis of  $[\text{Pt}_3(\mu_3\text{-C}_7\text{H}_7)_2(\text{CH}_3\text{CN})_3][\text{B}(\text{Ar}^{\text{F}})_4]_2$  (**1'-CH<sub>3</sub>CN**):** To a  $\text{CH}_2\text{Cl}_2$  solution of **1-CH<sub>3</sub>CN** (310 mg, 0.292 mmol) was added  $\text{NaB}(\text{Ar}^{\text{F}})_4$  (505.7 mg, 0.571 mmol). After stirring for 3 h at room temperature, the mixture was filtered and the filtrate was concentrated. Addition of *n*-hexane gave a brown powder of **1'-CH<sub>3</sub>CN** (686 mg, 90% yield).  $^1\text{H}$  NMR (400 MHz,  $\text{CD}_2\text{Cl}_2$ , 25 °C):  $\delta$  7.73 (s, 16H,  $\text{B}(\text{Ar}^{\text{F}})_4$ ), 7.57 (s, 8H,  $\text{B}(\text{Ar}^{\text{F}})_4$ ), 4.07 (s, 14H,  $\text{C}_7\text{H}_7$ ), 2.43 (s, 9H,  $\text{CH}_3\text{CN}$ ). Anal. Calcd. for  $\text{C}_{84}\text{H}_{47}\text{B}_2\text{F}_{48}\text{N}_3\text{Pt}_3$ : C, 38.55; H, 1.81; N, 1.61.

Found: C, 38.34; H, 1.84; N, 1.54.

**Synthesis of  $[\text{Pt}_3(\mu_3\text{-C}_7\text{H}_7)_2(\text{C}_2\text{H}_4)_3][\text{B}(\text{Ar}^{\text{F}})_4]_2$  ( $\mathbf{1}'\text{-C}_2\text{H}_4$ ):** The tris-acetonitrile sandwich complex  $\mathbf{1}'\text{-CH}_3\text{CN}$  (504 mg, 0.19 mmol) was dissolved in  $\text{CH}_2\text{Cl}_2$ , and ethylene gas was bubbled until volatiles were removed. This was repeated four times. The resultants were dissolved in  $\text{CH}_2\text{Cl}_2$ , and filtered. Addition of *n*-hexane to the solution gave yellow powder of  $\mathbf{1}'\text{-C}_2\text{H}_4$  (457 mg, 93% yield).  $^1\text{H}$  NMR (400 MHz, acetone- $d_6$ , 25 °C):  $\delta$  7.79 (s, 16H,  $\text{B}(\text{Ar}^{\text{F}})_4$ ), 7.68 (s, 8H,  $\text{B}(\text{Ar}^{\text{F}})_4$ ), 4.62 (s, 14H,  $\text{C}_7\text{H}_7$ ), 4.45 (s, 12H,  $\text{C}_2\text{H}_4$ ,  $^{195}\text{Pt}$  satellite doublet,  $J_{\text{Pt-H}} = 70$  Hz).  $^{13}\text{C}\{^1\text{H}\}$  NMR (100.5 MHz, acetone- $d_6$ , 25 °C):  $\delta$  162.6 (q,  $J_{\text{C-B}} = 50$  Hz,  $\text{B}(\text{Ar}^{\text{F}})_4$ ), 135.5 (s,  $\text{B}(\text{Ar}^{\text{F}})_4$ ), 130.0 (m,  $J_{\text{C-F}} = 29$  Hz,  $\text{B}(\text{Ar}^{\text{F}})_4$ ), 125.4 (q,  $J_{\text{C-F}} = 270$  Hz,  $\text{B}(\text{Ar}^{\text{F}})_4$ ), 118.5 (m,  $\text{B}(\text{Ar}^{\text{F}})_4$ ), 70.4 (s,  $\text{C}_2\text{H}_4$ ), 58.1 (s,  $\text{C}_7\text{H}_7$ ,  $^{195}\text{Pt}$  satellite doublet,  $J_{\text{Pt-H}} = 13$  Hz). Anal. Calcd. for  $\text{C}_{84}\text{H}_{50}\text{B}_2\text{F}_{48}\text{Pt}_3$ : C, 39.13; H, 1.95. Found: C, 38.46; H, 1.85.

**Synthesis of  $[\text{Pt}_3(\text{C}_7\text{H}_7)_2(\text{PPh}_3)_3][\text{BF}_4]_2$  ( $\mathbf{1}\text{-PPh}_3$ ):** To a  $\text{CH}_3\text{CN}$  solution of  $\mathbf{1}\text{-CH}_3\text{CN}$  (201 mg, 0.19 mmol) was added  $\text{PPh}_3$  (303 mg, 1.16 mmol). The reaction mixture was stirred for 3 h, and then the mixture was filtered, and the filtrate was concentrated. Addition of  $\text{Et}_2\text{O}$  to the solution gave a brown powder. Recrystallization from  $\text{CH}_3\text{CN}/\text{Et}_2\text{O}$  gave reddish brown crystals (276 mg, 84% yield).  $^1\text{H}$  NMR (400 MHz,  $\text{CD}_2\text{Cl}_2$ , 25 °C):  $\delta$  7.62 (m, 9H,  $\text{PPh}_3$ ), 7.57 (m, 18H,  $\text{PPh}_3$ ), 7.31 (m, 18H,  $\text{PPh}_3$ ), 3.40 (s, 14H,  $\text{C}_7\text{H}_7$ ).  $^{13}\text{C}\{^1\text{H}\}$  NMR (100.5 MHz,  $\text{CD}_2\text{Cl}_2$ , 25 °C):  $\delta$  134.3 ( $\text{PPh}_3$ ), 132.6 ( $\text{PPh}_3$ ), 129.8 ( $\text{PPh}_3$ ), 128.1 ( $\text{PPh}_3$ ), 52.3 ( $\text{C}_7\text{H}_7$ ).  $^{31}\text{P}\{^1\text{H}\}$  NMR (162.0 MHz,  $\text{CD}_2\text{Cl}_2$ , 25 °C):  $\delta$  9.7 (m,  $^1J_{\text{Pt-P}} = 4516$  Hz,  $^2J_{\text{Pt-P}} = 227$  Hz, and  $^3J_{\text{P-P}} = 76$  Hz,  $\text{PPh}_3$ ). Anal. Calcd. for  $\text{C}_{68}\text{H}_{59}\text{B}_2\text{F}_8\text{P}_3\text{Pt}_3$ : C, 47.27; H, 3.44. Found: C, 46.51; H, 3.31.

**Synthesis of  $[\text{Pt}_3(\text{C}_7\text{H}_7)_2(\text{py})_3][\text{BF}_4]_2$  ( $\mathbf{1}\text{-py}$ ):** To a  $\text{CH}_3\text{CN}$  solution of  $\mathbf{1}\text{-CH}_3\text{CN}$  (152 mg, 0.142 mmol) was added pyridine (88.0 mg, 1.11 mmol). The reaction mixture was stirred for 5 h, and then the mixture was filtered, and the filtrate was concentrated. Addition of  $\text{Et}_2\text{O}$  to the solution gave a brown powder. Recrystallization from  $\text{CH}_3\text{NO}_2/\text{Et}_2\text{O}$  gave reddish brown crystals (107 mg, 64% yield).  $^1\text{H}$  NMR (400 MHz,  $\text{CD}_2\text{Cl}_2$ , 25 °C):  $\delta$  8.42 (m, 6H, *o*-py), 7.89 (m, 3H, *p*-py), 7.42 (m, 6H, *m*-py), 3.98 (s, 14H,  $\text{C}_7\text{H}_7$ ).  $^{13}\text{C}\{^1\text{H}\}$  NMR (100.5 MHz,

CD<sub>2</sub>Cl<sub>2</sub>, 25 °C):  $\delta$  156.9 (s, *o*-py), 139.8 (s, *p*-py), 127.6 (s, *m*-py), 57.1 (s, C<sub>7</sub>H<sub>7</sub>). Anal. Calcd. for C<sub>29</sub>H<sub>29</sub>B<sub>2</sub>F<sub>8</sub>N<sub>3</sub>Pt<sub>3</sub>: C, 29.56; H, 2.48; N, 3.57. Found: C, 29.27; H, 2.48; N, 3.62.

**Synthesis of [Pt(C<sub>7</sub>H<sub>7</sub>)(PPh<sub>3</sub>)<sub>2</sub>][BF<sub>4</sub>] (2-PPh<sub>3</sub>):** To a solution of Pt(C<sub>2</sub>H<sub>4</sub>)(PPh<sub>3</sub>)<sub>2</sub> (69.3 mg, 0.093 mmol) in CH<sub>2</sub>Cl<sub>2</sub> was added [C<sub>7</sub>H<sub>7</sub>][BF<sub>4</sub>] (16.9 mg, 0.095 mmol), and the mixture was stirred for 3.5 h. The reaction mixture was filtered, and the filtrate was concentrated. Addition of Et<sub>2</sub>O gave a yellow powder of crude **2-PPh<sub>3</sub>**. Recrystallization from CH<sub>2</sub>Cl<sub>2</sub>/toluene/*n*-hexane gave yellow crystals of **2-PPh<sub>3</sub>** (57.9 mg, 69% yield). <sup>1</sup>H NMR (400 MHz, CD<sub>2</sub>Cl<sub>2</sub>, 25 °C):  $\delta$  7.45 (m, 6H, PPh<sub>3</sub>), 7.33 (m, 12H, PPh<sub>3</sub>), 7.24 (m, 12H, PPh<sub>3</sub>), 4.80 (s, 7H, C<sub>7</sub>H<sub>7</sub>, <sup>195</sup>Pt satellite doublet,  $J_{\text{Pt-H}} = 10$  Hz). <sup>13</sup>C{<sup>1</sup>H} NMR (100.5 MHz, CD<sub>2</sub>Cl<sub>2</sub>, 25 °C):  $\delta$  133.8 (m, PPh<sub>3</sub>), 131.8 (s, PPh<sub>3</sub>), 129.8 (m, PPh<sub>3</sub>), 129.2 (m, PPh<sub>3</sub>), 108.5 (s, C<sub>7</sub>H<sub>7</sub>). <sup>31</sup>P{<sup>1</sup>H} NMR (109.3 MHz, CD<sub>2</sub>Cl<sub>2</sub>, 25 °C):  $\delta$  23.7 (s, <sup>195</sup>Pt satellite doublet,  $J_{\text{Pt-H}} = 4216$  Hz). Anal. Calcd. for C<sub>43</sub>H<sub>37</sub>B<sub>1</sub>F<sub>4</sub>P<sub>3</sub>Pt<sub>1</sub>: C, 57.54; H, 4.15. Found: C, 56.85; H, 4.00.

**Synthesis of [Pt<sub>3</sub>( $\mu_3$ -C<sub>7</sub>H<sub>7</sub>)<sub>2</sub>(CH<sub>3</sub>CN)<sub>2</sub>Ph][BF<sub>4</sub>]<sub>2</sub> (3-CH<sub>3</sub>CN-Ph):** To a CH<sub>3</sub>CN solution of the complex **1-CH<sub>3</sub>CN** (120 mg, 0.113 mmol) was added a CH<sub>3</sub>CN solution of NaBPh<sub>4</sub> (38.6 mg, 0.113 mmol), and the reaction mixture was stirred for 6 h at 60 °C. The reaction mixture was then cooled to ambient temperature, and filtered. The filtrate was concentrated and Et<sub>2</sub>O was added. Resultant brown precipitate was collected and dried in vacuo. Recrystallization from CH<sub>3</sub>CN/Et<sub>2</sub>O gave brown crystals of **3-CH<sub>3</sub>CN-Ph** (89.5 mg, 78% yield). <sup>1</sup>H NMR (400 MHz, CD<sub>3</sub>CN, 25 °C):  $\delta$  7.05 (d,  $J = 7$  Hz, 2H, *o*-Ph, <sup>195</sup>Pt satellite dd,  $J_{\text{Pt-H}} = 39$  Hz), 6.93 (t,  $J = 7$  Hz, 2H, *m*-Ph), 6.86 (t,  $J = 7$  Hz, 2H, *p*-Ph), 3.91 (s, 14H, C<sub>7</sub>H<sub>7</sub>). <sup>13</sup>C{<sup>1</sup>H} NMR (100.5 MHz, CD<sub>3</sub>CN, 25 °C):  $\delta$  142.5 (s, *o*-Ph), 129.2 (s, *m*-Ph), 124.6 (s, *p*-Ph), 54.4 (s, C<sub>7</sub>H<sub>7</sub>). The *ipso*-carbon signal of the phenyl ligand was not assigned. Anal. Calcd. for C<sub>24</sub>H<sub>25</sub>B<sub>1</sub>F<sub>4</sub>N<sub>2</sub>Pt<sub>3</sub>: C, 28.44; H, 2.49; N, 2.76. Found: C, 28.97; H, 2.52; N, 2.44.

**Synthesis of [Pt<sub>3</sub>( $\mu_3$ -C<sub>7</sub>H<sub>7</sub>)<sub>2</sub>(C<sub>2</sub>H<sub>4</sub>)<sub>2</sub>Ph][B(Ar<sup>F</sup>)<sub>4</sub>]<sub>2</sub> (3'-C<sub>2</sub>H<sub>4</sub>-Ph):** To a suspension of **1-Ph-CH<sub>3</sub>CN** (69.7 mg, 0.069 mmol) in CH<sub>2</sub>Cl<sub>2</sub> was added NaB(Ar<sup>F</sup>)<sub>4</sub> (62.5 mg, 0.070 mmol), and then ethylene gas (1 atm) was bubbled until the solvent was removed. The resultant powder was resolved in CH<sub>2</sub>Cl<sub>2</sub>, and ethylene gas was bubbled again until the solvent was

removed. This ethylene flow evaporation was repeated 6 times. Then the CH<sub>2</sub>Cl<sub>2</sub> solution was filtered, and the filtrate was concentrated. Addition of *n*-hexane gave orange powder. Recrystallization from CH<sub>2</sub>Cl<sub>2</sub>/*n*-hexane under ethylene atmosphere gave reddish orange crystals of **3'-C<sub>2</sub>H<sub>4</sub>-Ph** (87.6 mg, 72% yield). <sup>1</sup>H NMR (400 MHz, CD<sub>2</sub>Cl<sub>2</sub>, 25 °C): δ 7.73 (s, 8H, B(Ar<sup>F</sup>)<sub>4</sub>), 7.57 (s, 4H, B(Ar<sup>F</sup>)<sub>4</sub>), 7.08 (d, *J* = 5 Hz, 2H, *o*-Ph, <sup>195</sup>Pt satellite doublet, *J*<sub>PtH</sub> = 50 Hz), 7.05 (t, *J* = 5 Hz, 2H, *m*-Ph), 6.97 (m, 1H, *p*-Ph), 3.88 (s, 14H, C<sub>7</sub>H<sub>7</sub>), 3.59 (s, 8H, C<sub>2</sub>H<sub>4</sub>, <sup>195</sup>Pt satellite doublet, *J*<sub>Pt-H</sub> = 60 Hz). <sup>13</sup>C{<sup>1</sup>H} NMR (100.5 MHz, CD<sub>2</sub>Cl<sub>2</sub>, 25 °C): δ 162.1 (q, *J*<sub>C-B</sub> = 50 Hz, B(Ar<sup>F</sup>)<sub>4</sub>), 141.7 (s, *o*-Ph, <sup>195</sup>Pt satellite doublet, *J*<sub>PtC</sub> = 28 Hz), 135.2 (s, B(Ar<sup>F</sup>)<sub>4</sub>), 129.9 (s, *m*-Ph), 129.2 (m, *J*<sub>C-F</sub> = 29 Hz, B(Ar<sup>F</sup>)<sub>4</sub>), 125.1 (s, *p*-Ph), 125.0 (q, *J*<sub>C-F</sub> = 270 Hz, B(Ar<sup>F</sup>)<sub>4</sub>), 117.9 (m, B(Ar<sup>F</sup>)<sub>4</sub>), 66.0 (s, C<sub>2</sub>H<sub>4</sub>, non simple <sup>195</sup>Pt satellite), 52.6 (s, C<sub>7</sub>H<sub>7</sub>). The ipso-carbon signal of the phenyl ligand was not assigned. Anal. Calcd. for C<sub>56</sub>H<sub>39</sub>B<sub>1</sub>F<sub>24</sub>Pt<sub>3</sub>: C, 38.13; H, 2.23. Found: C, 37.86; H, 2.12.

**Comment on [Pt(C<sub>7</sub>H<sub>7</sub>)(Ar<sup>F</sup>)(C<sub>2</sub>H<sub>4</sub>)<sub>2</sub>][BF<sub>4</sub>] (**3'-C<sub>2</sub>H<sub>4</sub>-Ar<sup>F</sup>**):** The reaction of Pt<sub>2</sub>(dba)<sub>3</sub> with [C<sub>7</sub>H<sub>7</sub>][B(Ar<sup>F</sup>)<sub>4</sub>] in the presence of ethylene at 25 °C in CD<sub>2</sub>Cl<sub>2</sub> unexpectedly gave the cationic triplatinum sandwich complex [Pt<sub>3</sub>(μ<sub>3</sub>-C<sub>7</sub>H<sub>7</sub>)<sub>2</sub>(Ar<sup>F</sup>)(C<sub>2</sub>H<sub>4</sub>)<sub>2</sub>][B(Ar<sup>F</sup>)<sub>4</sub>] (**3'-C<sub>2</sub>H<sub>4</sub>-Ar<sup>F</sup>**) bearing a 3,5-di-trifluoromethylphenyl ligand, where only a trace amount of tris-ethylene complex **1'-C<sub>2</sub>H<sub>4</sub>** was formed. We confirmed that **1'-C<sub>2</sub>H<sub>4</sub>** was stable in CD<sub>2</sub>Cl<sub>2</sub>. Probably, mono- or dinuclear intermediates are electrophilic enough to accept an Ar<sup>F</sup> group from the weakly nucleophilic [B(Ar<sup>F</sup>)<sub>4</sub>]<sup>-</sup>.<sup>18</sup> <sup>1</sup>H NMR spectra of **3'-C<sub>2</sub>H<sub>4</sub>-Ar<sup>F</sup>** in CD<sub>2</sub>Cl<sub>2</sub> showed a singlet signal for the cycloheptatrienyl protons at δ = 3.89 ppm, and a singlet signal for the ethylene protons at δ = 3.69 ppm with a <sup>195</sup>Pt satellite doublet (*J*<sub>Pt-H</sub> = 63 Hz). The structure of **3'-C<sub>2</sub>H<sub>4</sub>-Ar<sup>F</sup>** was determined by X-ray crystallographic analysis (Figure S1). The Pt<sub>3</sub> triangle is distorted to an isosceles triangle with the base Pt–Pt length (Pt2–Pt3 = 2.7554(4) Å) being shorter than the other two Pt–Pt lengths (Pt1–Pt2 2.8157(4) Å, Pt3–Pt1 2.8170(5) Å). The C–C lengths of the ethylene ligands (C15–C16 1.37(1) Å, C17–C18 1.38(1) Å) are comparable to those in **1'-C<sub>2</sub>H<sub>4</sub>**.

## References

1. K. Moseley, P. M. Maitlis, *J. Chem. Soc., Dalton Trans.* 1974, 169.
2. H. Tanaka, H. Kawazura, *Bull. Chem. Soc. Jpn.* 1979, **52**, 2815.
3. N. A. Yakelis, R. G. Bergman, *Organometallics*, 2005, **24**, 3579.

## X-ray Crystallographic Data for [Pt<sub>3</sub>(μ<sub>3</sub>-C<sub>7</sub>H<sub>7</sub>)<sub>2</sub>(C<sub>2</sub>H<sub>4</sub>)<sub>3</sub>][B(Ar<sup>F</sup>)<sub>4</sub>]<sub>2</sub> (1'-C<sub>2</sub>H<sub>4</sub>).

### A. Crystal Data

|                                                                |                                                                                                              |
|----------------------------------------------------------------|--------------------------------------------------------------------------------------------------------------|
| Empirical Formula                                              | C <sub>84</sub> H <sub>50</sub> Pt <sub>3</sub> B <sub>2</sub> F <sub>48</sub>                               |
| Formula Weight                                                 | 2578.13                                                                                                      |
| Crystal Color, Habit                                           | yellow, platelet                                                                                             |
| Crystal Dimensions                                             | 0.20 X 0.10 X 0.10 mm                                                                                        |
| Crystal System                                                 | monoclinic                                                                                                   |
| Lattice Type                                                   | C-centered                                                                                                   |
| No. of Reflections Used for Unit Cell Determination (2θ range) | 31893 ( 6.2 - 54.9° )                                                                                        |
| Indexing Images                                                | 3 oscillations at 3.5 minutes                                                                                |
| Camera Radius                                                  | 127.40 mm                                                                                                    |
| Lattice Parameters                                             | a = 19.6876(5) Å<br>b = 18.0489(4) Å<br>c = 24.2236(7) Å<br>β = 104.8498(9)°<br>V = 8320.1(4) Å <sup>3</sup> |
| Space Group                                                    | C2/c (#15)                                                                                                   |
| Z value                                                        | 4                                                                                                            |
| D <sub>calc</sub>                                              | 2.058 g/cm <sup>3</sup>                                                                                      |
| F <sub>000</sub>                                               | 4920.00                                                                                                      |
| μ(MoKα)                                                        | 51.66 cm <sup>-1</sup>                                                                                       |

### B. Intensity Measurements

|                |                                                |
|----------------|------------------------------------------------|
| Diffractometer | Rigaku RAXIS-RAPID Imaging Plate               |
| Radiation      | MoKα (λ = 0.71075 Å)<br>graphite monochromated |

|                                                           |                                                    |
|-----------------------------------------------------------|----------------------------------------------------|
| Temperature                                               | -150.0 °C                                          |
| Voltage, Current                                          | 50 kV, 40 mA                                       |
| Collimator Size                                           | 0.8 mm                                             |
| Detector Aperture                                         | 280.0 mm x 256.0 mm                                |
| Data Images                                               | 55 exposures at 1.7 minutes per degree             |
| Oscillation Range ( $\phi=90.0^\circ, \chi=45.0^\circ$ )  | $\omega$ 130.0 - 190.0° with 4.0° step             |
| Oscillation Range ( $\phi=270.0^\circ, \chi=45.0^\circ$ ) | $\omega$ 0.0 - 160.0° with 4.0° step               |
| Camera Radius                                             | 127.40 mm                                          |
| Pixel Size                                                | 0.100 mm                                           |
| $2\theta_{max}$                                           | 0.0°                                               |
| No. of Reflections Measured                               | Total: 40753<br>Unique: 9496 ( $R_{int} = 0.119$ ) |
| Corrections                                               | Lorentz-polarization                               |

### C. Structure Solution and Refinement

|                                                   |                                                                                        |
|---------------------------------------------------|----------------------------------------------------------------------------------------|
| Structure Solution                                | Patterson Methods (DIRDIF94 PATTY)                                                     |
| Refinement                                        | Full-matrix least-squares (SHELXL-97)                                                  |
| Function Minimized                                | $\Sigma w(F_o^2 - F_c^2)^2$                                                            |
| Least Squares Weights                             | $w = [\sigma^2(F_o^2) + (0.1000P)^2 + 0.0000P]^{-1}$<br>where $P = (F_o^2 + 2F_c^2)/3$ |
| No. of Reflections (All, $2\theta < 0.00^\circ$ ) | 8507                                                                                   |
| No. Variables                                     | 645                                                                                    |
| Reflection/Parameter Ratio                        | 13.19                                                                                  |
| Residuals: R; Rw                                  | 0.052 ; 0.172                                                                          |
| Goodness of Fit Indicator                         | 1.20                                                                                   |
| Max Shift/Error in Final Cycle                    | 0.02                                                                                   |
| Maximum peak in Final Diff. Map                   | 7.13 $e^-/\text{\AA}^3$                                                                |
| Minimum peak in Final Diff. Map                   | -5.11 $e^-/\text{\AA}^3$                                                               |



## X-ray Crystallographic Data for [Pt(C<sub>7</sub>H<sub>7</sub>)(PPh<sub>3</sub>)<sub>2</sub>][BF<sub>4</sub>](C<sub>6</sub>H<sub>6</sub>) (2-PPh<sub>3</sub>)

### A. Crystal Data

|                                                                        |                                                                                                               |
|------------------------------------------------------------------------|---------------------------------------------------------------------------------------------------------------|
| Empirical Formula                                                      | C <sub>49</sub> H <sub>43</sub> P <sub>2</sub> BF <sub>4</sub> Pt                                             |
| Formula Weight                                                         | 975.72                                                                                                        |
| Crystal Color, Habit                                                   | orange, block                                                                                                 |
| Crystal Dimensions                                                     | 0.40 X 0.20 X 0.20 mm                                                                                         |
| Crystal System                                                         | monoclinic                                                                                                    |
| Lattice Type                                                           | Primitive                                                                                                     |
| No. of Reflections Used for Unit Cell Determination (2 $\theta$ range) | 15382 ( 6.0 - 55.0° )                                                                                         |
| Indexing Images                                                        | 3 oscillations at 3.0 minutes                                                                                 |
| Camera Radius                                                          | 127.40 mm                                                                                                     |
| Lattice Parameters                                                     | a = 13.742(1) Å<br>b = 20.974(2) Å<br>c = 14.377(2) Å<br>$\beta$ = 99.419(3)°<br>V = 4088.2(8) Å <sup>3</sup> |
| Space Group                                                            | P2 <sub>1</sub> /a (#14)                                                                                      |
| Z value                                                                | 4                                                                                                             |
| D <sub>calc</sub>                                                      | 1.585 g/cm <sup>3</sup>                                                                                       |
| F <sub>000</sub>                                                       | 1944.00                                                                                                       |
| $\mu$ (MoK $\alpha$ )                                                  | 35.50 cm <sup>-1</sup>                                                                                        |

### B. Intensity Measurements

|                |                                                                 |
|----------------|-----------------------------------------------------------------|
| Diffractometer | Rigaku RAXIS-RAPID Imaging Plate                                |
| Radiation      | MoK $\alpha$ ( $\lambda$ = 0.71075 Å)<br>graphite monochromated |

|                                                           |                                                    |
|-----------------------------------------------------------|----------------------------------------------------|
| Temperature                                               | -100.0 °C                                          |
| Voltage, Current                                          | 50 kV, 40 mA                                       |
| Collimator Size                                           | 0.8 mm                                             |
| Detector Aperture                                         | 280.0 mm x 256.0 mm                                |
| Data Images                                               | 55 exposures at 1.7 minutes per degree             |
| Oscillation Range ( $\phi=0.0^\circ, \chi=45.0^\circ$ )   | $\omega$ 130.0 - 190.0° with 4.0° step             |
| Oscillation Range ( $\phi=180.0^\circ, \chi=45.0^\circ$ ) | $\omega$ 0.0 - 160.0° with 4.0° step               |
| Camera Radius                                             | 127.40 mm                                          |
| Pixel Size                                                | 0.100 mm                                           |
| $2\theta_{max}$                                           | 55.0°                                              |
| No. of Reflections Measured                               | Total: 40033<br>Unique: 9335 ( $R_{int} = 0.089$ ) |
| Corrections                                               | Lorentz-polarization                               |

#### C. Structure Solution and Refinement

|                                                    |                                                                                        |
|----------------------------------------------------|----------------------------------------------------------------------------------------|
| Structure Solution                                 | Patterson Methods (DIRDIF94 PATTY)                                                     |
| Refinement                                         | Full-matrix least-squares (SHELXL-97)                                                  |
| Function Minimized                                 | $\sum w(F_o^2 - F_c^2)^2$                                                              |
| Least Squares Weights                              | $w = [\sigma^2(F_o^2) + (0.1000P)^2 + 0.0000P]^{-1}$<br>where $P = (F_o^2 + 2F_c^2)/3$ |
| No. of Reflections (All, $2\theta < 54.97^\circ$ ) | 6062                                                                                   |
| No. Variables                                      | 455                                                                                    |
| Reflection/Parameter Ratio                         | 13.32                                                                                  |
| Residuals: R; Rw                                   | 0.077 ; 0.219                                                                          |
| Goodness of Fit Indicator                          | 1.29                                                                                   |
| Max Shift/Error in Final Cycle                     | 11.03                                                                                  |
| Maximum peak in Final Diff. Map                    | 2.43 $e^-/\text{\AA}^3$                                                                |
| Minimum peak in Final Diff. Map                    | -1.73 $e^-/\text{\AA}^3$                                                               |

**X-ray Crystallographic Data for [Pt<sub>3</sub>(μ<sub>3</sub>-C<sub>7</sub>H<sub>7</sub>)<sub>2</sub>(Ar<sup>F</sup>)(C<sub>2</sub>H<sub>4</sub>)<sub>2</sub>][B(Ar<sup>F</sup>)<sub>4</sub>](C<sub>2</sub>H<sub>4</sub>Cl<sub>2</sub>)  
(3'-C<sub>2</sub>H<sub>4</sub>-Ar<sup>F</sup>).**

A. Crystal Data

|                                                                |                                                                                                                                                 |
|----------------------------------------------------------------|-------------------------------------------------------------------------------------------------------------------------------------------------|
| Empirical Formula                                              | C <sub>60</sub> H <sub>41</sub> Pt <sub>3</sub> BF <sub>30</sub> Cl <sub>2</sub>                                                                |
| Formula Weight                                                 | 1998.92                                                                                                                                         |
| Crystal Color, Habit                                           | orange, block                                                                                                                                   |
| Crystal Dimensions                                             | 0.15 X 0.10 X 0.10 mm                                                                                                                           |
| Crystal System                                                 | triclinic                                                                                                                                       |
| Lattice Type                                                   | Primitive                                                                                                                                       |
| No. of Reflections Used for Unit Cell Determination (2θ range) | 21420 ( 6.0 - 54.9° )                                                                                                                           |
| Indexing Images                                                | 3 oscillations at 3.5 minutes                                                                                                                   |
| Camera Radius                                                  | 127.40 mm                                                                                                                                       |
| Lattice Parameters                                             | a = 12.3189(5) Å<br>b = 15.2911(6) Å<br>c = 16.4704(5) Å<br>α = 97.219(1)°<br>β = 90.674(1)°<br>γ = 105.503(1)°<br>V = 2962.6(2) Å <sup>3</sup> |
| Space Group                                                    | P1 (#2)                                                                                                                                         |
| Z value                                                        | 2                                                                                                                                               |
| D <sub>calc</sub>                                              | 2.241 g/cm <sup>3</sup>                                                                                                                         |
| F <sub>000</sub>                                               | 1888.00                                                                                                                                         |
| μ(MoKα)                                                        | 72.64 cm <sup>-1</sup>                                                                                                                          |

B. Intensity Measurements

|                |                                  |
|----------------|----------------------------------|
| Diffractometer | Rigaku RAXIS-RAPID Imaging Plate |
|----------------|----------------------------------|

|                                                           |                                                                            |
|-----------------------------------------------------------|----------------------------------------------------------------------------|
| Radiation                                                 | MoK $\alpha$ ( $\lambda = 0.71075 \text{ \AA}$ )<br>graphite monochromated |
| Temperature                                               | -150.0 °C                                                                  |
| Voltage, Current                                          | 50 kV, 40 mA                                                               |
| Collimator Size                                           | 0.8 mm                                                                     |
| Detector Aperture                                         | 280.0 mm x 256.0 mm                                                        |
| Data Images                                               | 55 exposures at 2.5 minutes per degree                                     |
| Oscillation Range ( $\phi=0.0^\circ, \chi=45.0^\circ$ )   | $\omega$ 130.0 - 190.0° with 4.0° step                                     |
| Oscillation Range ( $\phi=180.0^\circ, \chi=45.0^\circ$ ) | $\omega$ 0.0 - 160.0° with 4.0° step                                       |
| Camera Radius                                             | 127.40 mm                                                                  |
| Pixel Size                                                | 0.100 mm                                                                   |
| $2\theta_{max}$                                           | 0.0°                                                                       |
| No. of Reflections Measured                               | Total: 29229<br>Unique: 13421 ( $R_{int} = 0.103$ )                        |
| Corrections                                               | Lorentz-polarization                                                       |

### C. Structure Solution and Refinement

|                                                   |                                                                                        |
|---------------------------------------------------|----------------------------------------------------------------------------------------|
| Structure Solution                                | Patterson Methods (DIRDIF94 PATTY)                                                     |
| Refinement                                        | Full-matrix least-squares (SHELXL-97)                                                  |
| Function Minimized                                | $\Sigma w(F_o^2 - F_c^2)^2$                                                            |
| Least Squares Weights                             | $w = [\sigma^2(F_o^2) + (0.1000P)^2 + 0.0000P]^{-1}$<br>where $P = (F_o^2 + 2F_c^2)/3$ |
| No. of Reflections (All, $2\theta < 0.00^\circ$ ) | 11375                                                                                  |
| No. Variables                                     | 892                                                                                    |
| Reflection/Parameter Ratio                        | 12.75                                                                                  |
| Residuals: R; Rw                                  | 0.056 ; 0.157                                                                          |
| Goodness of Fit Indicator                         | 0.99                                                                                   |
| Max Shift/Error in Final Cycle                    | 0.52                                                                                   |

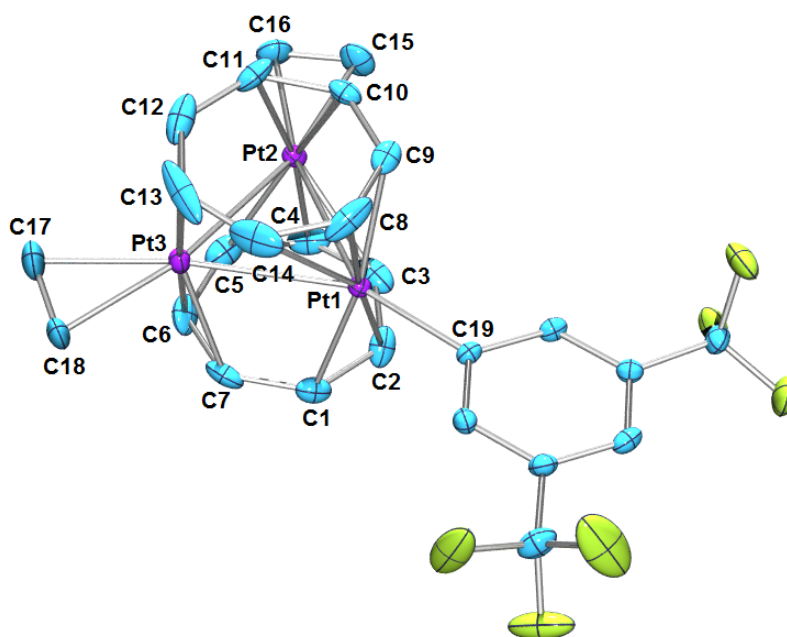

**Figure S1.** ORTEP drawing of  $[\text{Pt}_3(\mu_3\text{-C}_7\text{H}_7)_2(\text{Ar}^{\text{F}})(\text{C}_2\text{H}_4)_2][\text{B}(\text{Ar}^{\text{F}})_4]$  ( $\mathbf{3}'\text{-C}_2\text{H}_4\text{-Ar}^{\text{F}}$ ) (30% probability ellipsoids. Counter anion and solvents are omitted for clarity). Pt1–Pt2 2.8157(4), Pt2–Pt3 2.7554(4), Pt3–Pt1 2.8170(5), Pt2–C15 2.220(8), Pt2–C16 2.219(8), Pt3–C17 2.24(1), Pt3–C18 2.236(9), Pt1–C19 2.080(6), C15–C16 1.37(1), C17–C18 1.38(1), Pt2–Pt1–Pt3 58.573(10), Pt1–Pt2–Pt3 60.74(1).

## X-ray Crystallographic Data for [Pt<sub>3</sub>(μ<sub>3</sub>-C<sub>7</sub>H<sub>7</sub>)<sub>2</sub>(Ph)(C<sub>2</sub>H<sub>4</sub>)<sub>2</sub>][B(Ar<sup>F</sup>)<sub>4</sub>] (3'-C<sub>2</sub>H<sub>4</sub>-Ph).

### A. Crystal Data

|                                                                |                                                                                                            |
|----------------------------------------------------------------|------------------------------------------------------------------------------------------------------------|
| Empirical Formula                                              | C <sub>56</sub> H <sub>39</sub> Pt <sub>3</sub> BF <sub>24</sub>                                           |
| Formula Weight                                                 | 1763.97                                                                                                    |
| Crystal Color, Habit                                           | reddish, block                                                                                             |
| Crystal Dimensions                                             | 0.25 X 0.20 X 0.15 mm                                                                                      |
| Crystal System                                                 | monoclinic                                                                                                 |
| Lattice Type                                                   | Primitive                                                                                                  |
| No. of Reflections Used for Unit Cell Determination (2θ range) | 28245 ( 6.0 - 54.9° )                                                                                      |
| Indexing Images                                                | 3 oscillations at 3.5 minutes                                                                              |
| Camera Radius                                                  | 127.40 mm                                                                                                  |
| Lattice Parameters                                             | a = 11.4558(4) Å<br>b = 19.1713(7) Å<br>c = 25.517(1) Å<br>β = 103.809(1)°<br>V = 5442.2(3) Å <sup>3</sup> |
| Space Group                                                    | P2 <sub>1</sub> /n (#14)                                                                                   |
| Z value                                                        | 4                                                                                                          |
| D <sub>calc</sub>                                              | 2.153 g/cm <sup>3</sup>                                                                                    |
| F <sub>000</sub>                                               | 3320.00                                                                                                    |
| μ(MoKα)                                                        | 77.83 cm <sup>-1</sup>                                                                                     |

### B. Intensity Measurements

|                |                                                |
|----------------|------------------------------------------------|
| Diffractometer | Rigaku RAXIS-RAPID Imaging Plate               |
| Radiation      | MoKα (λ = 0.71075 Å)<br>graphite monochromated |

|                                                           |                                                     |
|-----------------------------------------------------------|-----------------------------------------------------|
| Temperature                                               | -150.0 °C                                           |
| Voltage, Current                                          | 50 kV, 40 mA                                        |
| Collimator Size                                           | 0.8 mm                                              |
| Detector Aperture                                         | 280.0 mm x 256.0 mm                                 |
| Data Images                                               | 44 exposures at 1.7 minutes per degree              |
| Oscillation Range ( $\phi=90.0^\circ, \chi=45.0^\circ$ )  | $\omega$ 130.0 - 190.0° with 5.0° step              |
| Oscillation Range ( $\phi=270.0^\circ, \chi=45.0^\circ$ ) | $\omega$ 0.0 - 160.0° with 5.0° step                |
| Camera Radius                                             | 127.40 mm                                           |
| Pixel Size                                                | 0.100 mm                                            |
| $2\theta_{max}$                                           | 55.0°                                               |
| No. of Reflections Measured                               | Total: 53410<br>Unique: 12424 ( $R_{int} = 0.070$ ) |
| Corrections                                               | Lorentz-polarization                                |

### C. Structure Solution and Refinement

|                                                                       |                                                                           |
|-----------------------------------------------------------------------|---------------------------------------------------------------------------|
| Structure Solution                                                    | Patterson Methods (DIRDIF94 PATTY)                                        |
| Refinement                                                            | Full-matrix least-squares                                                 |
| Function Minimized                                                    | $\Sigma w( Fo  -  Fc )^2$                                                 |
| Least Squares Weights                                                 | $w = \frac{1}{\sigma^2(Fo)} = [\sigma_c^2(Fo) + \frac{e^2}{4} Fo^2]^{-1}$ |
| p-factor                                                              | 0.0500                                                                    |
| Anomalous Dispersion                                                  | All non-hydrogen atoms                                                    |
| No. of Observations ( $I > 2.00\sigma(I)$ , $2\theta < 54.95^\circ$ ) | 5862                                                                      |
| No. Variables                                                         | 757                                                                       |
| Reflection/Parameter Ratio                                            | 7.74                                                                      |
| Residuals: R; Rw                                                      | 0.045 ; 0.056                                                             |
| Residuals: R1                                                         | 0.045                                                                     |
| No. of Reflections to calc R1                                         | 5862                                                                      |
| Goodness of Fit Indicator                                             | 1.08                                                                      |
| Max Shift/Error in Final Cycle                                        | 3.115                                                                     |
| Maximum peak in Final Diff. Map                                       | 1.45 $e^-/\text{\AA}^3$                                                   |
| Minimum peak in Final Diff. Map                                       | -1.24 $e^-/\text{\AA}^3$                                                  |
